# Supplementary material for: Altered Cell Surface N-Glycosylation of Resting and Activated T Cells in Systemic Lupus Erythematosus
Source: PubMed Central journal article supplement (PMC6770513; doi:10.3390/ijms20184455), 2019-09-10
Supplement: ijms-20-04455-s001.pdf [file ijms-20-04455-s001.pdf]

Supplementary Data

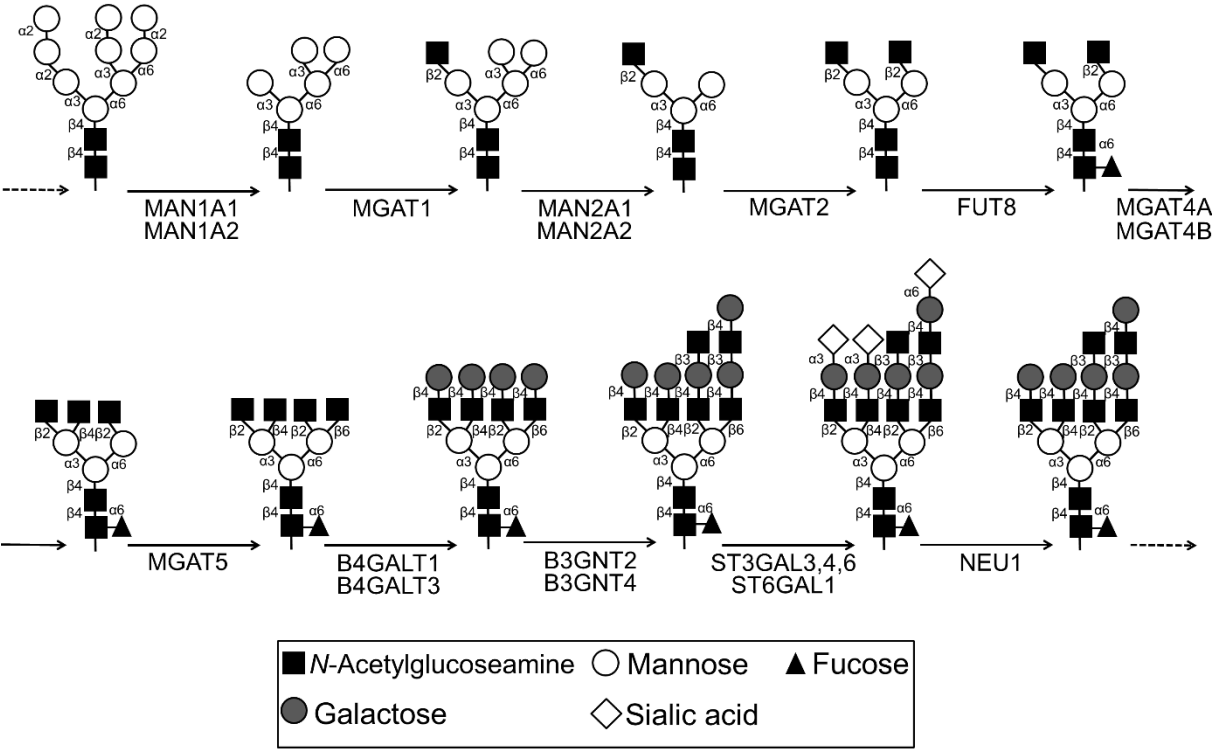

**Figure S1.** Schema of the protein N-linked glycosylation pathway in mammals. Human gene symbols encoding glycan modifying enzymes are shown below the arrows. For the explanation of the abbreviations of enzyme names, please refer to Table 2.



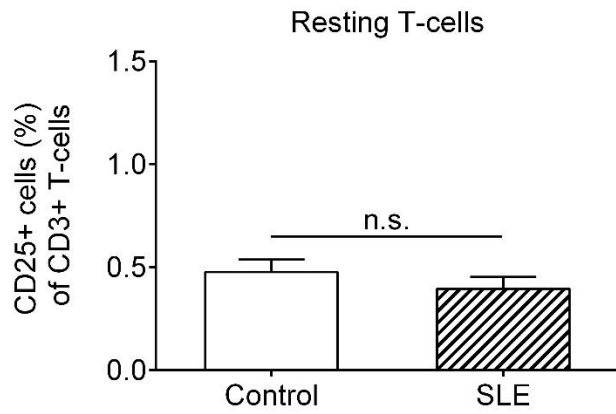

**Figure S3.** Ratio of CD25-positive cells among resting T cells. Peripheral blood mononuclear cells were obtained from healthy controls and SLE patients. PBMCs were stained with viability dye, fixed, then labeled with anti-CD3-PE-Cy5 antibody and anti-CD25-PE antibody (BioLegend), and evaluated by flow cytometry as described in the lectin binding assay section of the Materials and Methods. The percentage of CD25-positive cells within the CD3-positive living T cell population is shown. Statistical analysis was performed using an unpaired *t*-test, n.s. = not significant.
